# Supplementary material for: Comparative cell cycle transcriptomics reveals synchronization of developmental transcription factor networks in cancer cells
Source: PubMed Central journal article supplement (PMC5724894; doi:10.1371/journal.pone.0188772), 2017-12-11
Supplement: pone.0188772.s007.pdf [file pone.0188772.s007.pdf]

**Supplementary table S1a: Minimum Information about a Flow Cytometry Experiment (MIFlowCyt)**

| <b>Requirement</b>                                     | <b>Please Include Requested Information</b>                                                                                                                                                                                                                                   |
|--------------------------------------------------------|-------------------------------------------------------------------------------------------------------------------------------------------------------------------------------------------------------------------------------------------------------------------------------|
| 1.1. Purpose                                           | Sort 200 000 cells per phase for RNA sequencing and 500 000 cells for immunoblotting from HeLa S. FUCCI cell line.                                                                                                                                                            |
| 1.2. Keywords                                          | Cell cycle, circadian molecular clock, FUCCI                                                                                                                                                                                                                                  |
| 1.3. Experiment variables                              | Cell cycle-sorted HeLa cell lines using FUCCI reporters.                                                                                                                                                                                                                      |
| 1.4. Organization name and address                     | Department of Cytokinetics, Institute of Biophysics CAS, v.v.i., Královopolská 135, 612 65 Brno, Czech Republic                                                                                                                                                               |
| 1.5. Primary contact name and email address            | Michael Andäng, <a href="mailto:michael.andang@ki.se">michael.andang@ki.se</a> ,<br>Department of Physiology and Pharmacology, Karolinska Institutet, 171 77 Stockholm, Sweden.<br>Central European Institute of Technology, Masaryk University, 625 00 Brno, Czech Republic. |
| 1.6. Date or time period of experiment                 | 18.6.2010 – 20.12.2012                                                                                                                                                                                                                                                        |
| 1.7. Conclusions                                       | 200 000 cells per phase were sorted for subsequent analyses into 200 µl of RLT lysis buffer with 1% 2-mercaptoethanol for the RNA sequencing, and 500 000 cells per phase for immunoblotting into 100 µl of lysis buffer.                                                     |
| 1.8. Quality control measures                          | Cell aggregates and debris were excluded from the analysis based on FCS-A vs. FCS-H, and FSC-A vs. SSC-A a dual-parameter dot plots. For each phase post-sorting control was done.                                                                                            |
| 2.1.1.1. (2.1.2.1., 2.1.3.1.) Sample description       | Cells were grown to sub-confluency, collected by trypsinisation, washed with full DMEM/McCoy's with 10% serum, 5% Glutamax and 100U/ml penicillin-streptomycin, spinned down by centrifugation at 200 g for 5 minutes and resuspended in culture media before sorting.        |
| 2.1.1.2. Biological sample source description          | HeLa.S FUCCI human cervical carcinoma cell line – source: Riken Cell Bank.                                                                                                                                                                                                    |
| 2.1.1.3. Biological sample source organism description | Human.                                                                                                                                                                                                                                                                        |
| 2.1.2.2. Environmental sample location                 | -                                                                                                                                                                                                                                                                             |
| 2.3. Sample treatment description                      | Samples were not treated.                                                                                                                                                                                                                                                     |

| 2.4. Fluorescence reagent(s) description   | <table border="1"> <thead> <tr> <th>Marker</th> <th>Laser</th> <th>Manufacturer</th> <th>Power</th> <th>Detector</th> <th>Dichroic Mirror // Band Pass Filter (nm)</th> <th>Installation date</th> <th>Instrument</th> </tr> </thead> <tbody> <tr> <td>mAG-hGem</td> <td>488</td> <td>Coherent Sapphire</td> <td>100 mW</td> <td>F - Blue Octagon</td> <td>505LP // 525/50</td> <td>2009</td> <td>FACSAria II Sorp</td> </tr> <tr> <td>mKO2-hCdt1</td> <td>488</td> <td>Coherent Sapphire</td> <td>100 mW</td> <td>E - Blue Octagon</td> <td>550LP // 575/25</td> <td>2009</td> <td>FACSAria II Sorp</td> </tr> </tbody> </table> | Marker            | Laser  | Manufacturer     | Power                                    | Detector          | Dichroic Mirror // Band Pass Filter (nm) | Installation date | Instrument | mAG-hGem | 488 | Coherent Sapphire | 100 mW | F - Blue Octagon | 505LP // 525/50 | 2009 | FACSAria II Sorp | mKO2-hCdt1 | 488 | Coherent Sapphire | 100 mW | E - Blue Octagon | 550LP // 575/25 | 2009 | FACSAria II Sorp |
|--------------------------------------------|-----------------------------------------------------------------------------------------------------------------------------------------------------------------------------------------------------------------------------------------------------------------------------------------------------------------------------------------------------------------------------------------------------------------------------------------------------------------------------------------------------------------------------------------------------------------------------------------------------------------------------------|-------------------|--------|------------------|------------------------------------------|-------------------|------------------------------------------|-------------------|------------|----------|-----|-------------------|--------|------------------|-----------------|------|------------------|------------|-----|-------------------|--------|------------------|-----------------|------|------------------|
| Marker                                     | Laser                                                                                                                                                                                                                                                                                                                                                                                                                                                                                                                                                                                                                             | Manufacturer      | Power  | Detector         | Dichroic Mirror // Band Pass Filter (nm) | Installation date | Instrument                               |                   |            |          |     |                   |        |                  |                 |      |                  |            |     |                   |        |                  |                 |      |                  |
| mAG-hGem                                   | 488                                                                                                                                                                                                                                                                                                                                                                                                                                                                                                                                                                                                                               | Coherent Sapphire | 100 mW | F - Blue Octagon | 505LP // 525/50                          | 2009              | FACSAria II Sorp                         |                   |            |          |     |                   |        |                  |                 |      |                  |            |     |                   |        |                  |                 |      |                  |
| mKO2-hCdt1                                 | 488                                                                                                                                                                                                                                                                                                                                                                                                                                                                                                                                                                                                                               | Coherent Sapphire | 100 mW | E - Blue Octagon | 550LP // 575/25                          | 2009              | FACSAria II Sorp                         |                   |            |          |     |                   |        |                  |                 |      |                  |            |     |                   |        |                  |                 |      |                  |
| 3.1. Instrument manufacturer               | BD Biosciences, San Jose, CA 95131 USA                                                                                                                                                                                                                                                                                                                                                                                                                                                                                                                                                                                            |                   |        |                  |                                          |                   |                                          |                   |            |          |     |                   |        |                  |                 |      |                  |            |     |                   |        |                  |                 |      |                  |
| 3.2. Instrument model                      | BD FACSAria™ II Cell Sorter (ver. Sorp 4L), Serial number: PY500001                                                                                                                                                                                                                                                                                                                                                                                                                                                                                                                                                               |                   |        |                  |                                          |                   |                                          |                   |            |          |     |                   |        |                  |                 |      |                  |            |     |                   |        |                  |                 |      |                  |
| 3.3. Instrument configuration and settings | <p>488nm laser excitation:</p> 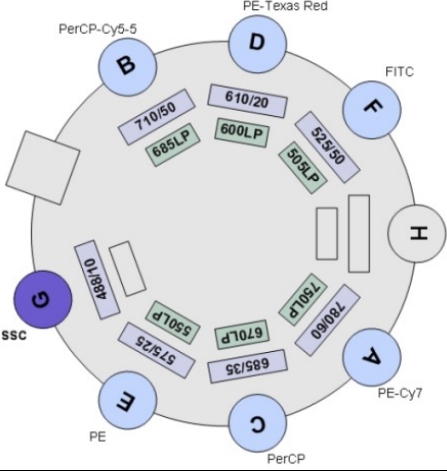                                                                                                                                                                                                                                                                                                                                                                                                                                                                                                                |                   |        |                  |                                          |                   |                                          |                   |            |          |     |                   |        |                  |                 |      |                  |            |     |                   |        |                  |                 |      |                  |
| 4.1. List-mode data files                  | FCS data files can be obtained by contacting Michael Andäng after this work has been published.                                                                                                                                                                                                                                                                                                                                                                                                                                                                                                                                   |                   |        |                  |                                          |                   |                                          |                   |            |          |     |                   |        |                  |                 |      |                  |            |     |                   |        |                  |                 |      |                  |
| 4.2. Compensation description              | Manual compensation was applied based on quantification of medians of positive and negative populations on both markers hGem-mAG (detector F) vs. hCdt1-mKO2 (detector E).                                                                                                                                                                                                                                                                                                                                                                                                                                                        |                   |        |                  |                                          |                   |                                          |                   |            |          |     |                   |        |                  |                 |      |                  |            |     |                   |        |                  |                 |      |                  |
| 4.3. Data transformation details           | FACSDiva (Version 6.1.3; BD Biosciences) and FlowJo software (Version 10.0.7, Tree Star, Ashland, OR, USA) was used for data visualization.                                                                                                                                                                                                                                                                                                                                                                                                                                                                                       |                   |        |                  |                                          |                   |                                          |                   |            |          |     |                   |        |                  |                 |      |                  |            |     |                   |        |                  |                 |      |                  |
| 4.4.1. Gate description                    | <p>Single cells: FSC-A vs. FSC-H gate to define single cells from doublets.</p> <p>Debris exclusion: FSC-A vs. SSC-A gate to define compact population of cells without debris.</p> <p>G1: hGem-mAG (detector F) vs. hCdt1-mKO2 (detector E) gate to define G1 cell cycle phase.</p> <p>S: hGem-mAG (detector F) vs. hCdt1-mKO2 (detector E) gate to define G1/S cell cycle phase</p> <p>G2: hGem-mAG (detector F) vs. hCdt1-mKO2 (detector E) gate to define S/G2/M cell cycle phase</p>                                                                                                                                         |                   |        |                  |                                          |                   |                                          |                   |            |          |     |                   |        |                  |                 |      |                  |            |     |                   |        |                  |                 |      |                  |
| 4.4.2. Gate statistics                     | Please see the next section.                                                                                                                                                                                                                                                                                                                                                                                                                                                                                                                                                                                                      |                   |        |                  |                                          |                   |                                          |                   |            |          |     |                   |        |                  |                 |      |                  |            |     |                   |        |                  |                 |      |                  |
| 4.4.3. Gate boundaries                     |                                                                                                                                                                                                                                                                                                                                                                                                                                                                                                                                                |                   |        |                  |                                          |                   |                                          |                   |            |          |     |                   |        |                  |                 |      |                  |            |     |                   |        |                  |                 |      |                  |

**Supplementary table S1b: Minimum Information about a Flow Cytometry Experiment (MIFlowCyt)**

| <b>Requirement</b>                                     | <b>Please Include Requested Information</b>                                                                                                                                                                                                                    |              |                     |              |                 |                                                 |                          |                   |
|--------------------------------------------------------|----------------------------------------------------------------------------------------------------------------------------------------------------------------------------------------------------------------------------------------------------------------|--------------|---------------------|--------------|-----------------|-------------------------------------------------|--------------------------|-------------------|
| 1.1. Purpose                                           | Sort 200 000 cells per phase for RNA sequencing of U2OS FUCCI cell line.                                                                                                                                                                                       |              |                     |              |                 |                                                 |                          |                   |
| 1.2. Keywords                                          | Cell cycle, FUCCI                                                                                                                                                                                                                                              |              |                     |              |                 |                                                 |                          |                   |
| 1.3. Experiment variables                              | Cell cycle-sorted U2OS cell line using FUCCI reporters.                                                                                                                                                                                                        |              |                     |              |                 |                                                 |                          |                   |
| 1.4. Organization name and address                     | Karolinska Institutet CMM<br>Flow Cytometry facility L8:03, 17176 Stockholm, Sweden                                                                                                                                                                            |              |                     |              |                 |                                                 |                          |                   |
| 1.5. Primary contact name and email address            | Mikael Altun, Mikael.altun@ki.se<br>Department of Medical Biochemistry and Biophysics, Karolinska Institutet, 171 77 Stockholm, Sweden.                                                                                                                        |              |                     |              |                 |                                                 |                          |                   |
| 1.6. Date or time period of experiment                 | 7.10.2013 – 28.1.2014                                                                                                                                                                                                                                          |              |                     |              |                 |                                                 |                          |                   |
| 1.7. Conclusions                                       | 200 000 cells per phase were sorted for subsequent analyses into 200 µl of Qiazol Lysis Reagent (Qiazol)                                                                                                                                                       |              |                     |              |                 |                                                 |                          |                   |
| 1.8. Quality control measures                          | Cell aggregates and debris were excluded from the analysis based on FSC-A vs SSC-A and FSC-A vs FSC-W                                                                                                                                                          |              |                     |              |                 |                                                 |                          |                   |
| 2.1.1.1. (2.1.2.1., 2.1.3.1.) Sample description       | Cells were grown to sub-confluency, collected by trypsinisation, washed with full McCoy's with 10% serum, 5% Glutamax and 100U/ml penicillin-streptomycin, spun down by centrifugation at 500 g for 5 minutes and resuspended in culture media before sorting. |              |                     |              |                 |                                                 |                          |                   |
| 2.1.1.2. Biological sample source description          | U2OS FUCCI human osteosarcoma cell line – source: Gift from Dr. Masai at the Tokyo Metropolitan Institute of Medical Science, Japan.                                                                                                                           |              |                     |              |                 |                                                 |                          |                   |
| 2.1.1.3. Biological sample source organism description | Human.                                                                                                                                                                                                                                                         |              |                     |              |                 |                                                 |                          |                   |
| 2.1.2.2. Environmental sample location                 | -                                                                                                                                                                                                                                                              |              |                     |              |                 |                                                 |                          |                   |
| 2.3. Sample treatment description                      | Samples were not treated.                                                                                                                                                                                                                                      |              |                     |              |                 |                                                 |                          |                   |
| 2.4. Fluorescence reagent(s) description               | <b>Marker</b>                                                                                                                                                                                                                                                  | <b>Laser</b> | <b>Manufacturer</b> | <b>Power</b> | <b>Detector</b> | <b>Dichroic Mirror // Band Pass Filter (nm)</b> | <b>Installation date</b> | <b>Instrument</b> |
|                                                        | mAG-hGem                                                                                                                                                                                                                                                       | 488          | Coherent            | 150mW        | 3               | 555DLP//530/40                                  | 01/2002                  | MoFlo legacy      |

|                                            |                                                                                                                                                                                                                                                                                                                                                                                                                                                                    |     |              |      |   |                |         |              |  |
|--------------------------------------------|--------------------------------------------------------------------------------------------------------------------------------------------------------------------------------------------------------------------------------------------------------------------------------------------------------------------------------------------------------------------------------------------------------------------------------------------------------------------|-----|--------------|------|---|----------------|---------|--------------|--|
|                                            | mKO2-hCdt1                                                                                                                                                                                                                                                                                                                                                                                                                                                         | 561 | Melles Griot | 35mW | 6 | 605DLP//585/29 | 01/2002 | MoFlo Legacy |  |
| 3.1. Instrument manufacturer               | Beckman Coulter, USA                                                                                                                                                                                                                                                                                                                                                                                                                                               |     |              |      |   |                |         |              |  |
| 3.2. Instrument model                      | MoFlo Legacy                                                                                                                                                                                                                                                                                                                                                                                                                                                       |     |              |      |   |                |         |              |  |
| 3.3. Instrument configuration and settings | 488nm laser excitation: 530/40 (detector 3)<br>561nm laser excitation: 585/29 (detector 6)                                                                                                                                                                                                                                                                                                                                                                         |     |              |      |   |                |         |              |  |
| 4.1. List-mode data files                  | -                                                                                                                                                                                                                                                                                                                                                                                                                                                                  |     |              |      |   |                |         |              |  |
| 4.2. Compensation description              | Manual compensation was applied based on quantification of medians of positive and negative populations on both markers hGem-mAG (detector 3) vs. hCdt1-mKO2 (detector 6).                                                                                                                                                                                                                                                                                         |     |              |      |   |                |         |              |  |
| 4.3. Data transformation details           | Summit (V4.3.02) was used for data visualization.                                                                                                                                                                                                                                                                                                                                                                                                                  |     |              |      |   |                |         |              |  |
| 4.4.1. Gate description                    | Single cells: FSC-A vs. FSC-W gate to define single cells from doublets.<br>Debris exclusion: FSC-A vs. SSC-A gate to define compact population of cells without debris.<br>G1: hGem-mAG (detector 3) vs. hCdt1-mKO2 (detector 6) gate to define G1 cell cycle phase.<br>S: hGem-mAG (detector 3) vs. hCdt1-mKO2 (detector 6) gate to define G1/S cell cycle phase<br>G2: hGem-mAG (detector 3) vs. hCdt1-mKO2 (detector 6) gate to define S/G2/M cell cycle phase |     |              |      |   |                |         |              |  |
| 4.4.2. Gate statistics                     | Please see the next section.                                                                                                                                                                                                                                                                                                                                                                                                                                       |     |              |      |   |                |         |              |  |
| 4.4.3. Gate boundaries                     |                                                                                                                                                                                                                                                                                                                                                                                                                                                                    |     |              |      |   |                |         |              |  |
